# Supplementary material for: Microfluidic synthesis of protein-loaded nanogels in a coaxial flow reactor using a design of experiments approach
Source: Royal Society of Chemistry journal article supplement (doi:10.1039/d0na01051k), 2021-01-01
Supplement: d0na01051k1.pdf [file d0na01051k1.pdf]

## Supplementary Information

**Table S1**

Non-codified and codified factor levels for the central composite design

|                                    | Non-Codified level | Low                                                               | Mid                                                               | High                                                              |
|------------------------------------|--------------------|-------------------------------------------------------------------|-------------------------------------------------------------------|-------------------------------------------------------------------|
|                                    | Codified level     | -                                                                 | 0                                                                 | +                                                                 |
| Factor                             | Symbol             |                                                                   |                                                                   |                                                                   |
| Chitosan conc. (%w/v)              | (A)                | 0.1                                                               | 0.2                                                               | 0.3                                                               |
| TPP conc. (%w/v)                   | (B)                | 0.010                                                             | 0.015                                                             | 0.020                                                             |
| Flow ratio (core/sheath flow rate) | (C)                | 0.1<br>(16 $\mu\text{Lmin}^{-1}$ /<br>160 $\mu\text{Lmin}^{-1}$ ) | 0.2<br>(32 $\mu\text{Lmin}^{-1}$ /<br>160 $\mu\text{Lmin}^{-1}$ ) | 0.3<br>(48 $\mu\text{Lmin}^{-1}$ /<br>160 $\mu\text{Lmin}^{-1}$ ) |
| Lysozyme conc. (%w/v)              | (D)                | 0.1                                                               | 0.2                                                               | 0.3                                                               |

**Table S2**

Viscosities of the various solutions used in the DOE experimental model

| Sample number | Chitosan (% w/v) | Lysozyme (% w/v) | Dynamic viscosity (cp) |
|---------------|------------------|------------------|------------------------|
| 1             | 0.1              | 0.1              | 1.4885                 |
| 2             | 0.1              | 0.2              | 1.4907                 |
| 3             | 0.1              | 0.3              | 1.4737                 |
| 4             | 0.2              | 0.1              | 2.1568                 |
| 5             | 0.2              | 0.2              | 2.1152                 |
| 6             | 0.2              | 0.3              | 1.9188                 |
| 7             | 0.3              | 0.1              | 2.8353                 |
| 8             | 0.3              | 0.2              | 2.1215                 |
| 9             | 0.3              | 0.3              | 2.0294                 |

**Table S3**

Table showing functional groups and their corresponding wavelengths in the FTIR spectra shown in Fig.5 (a) and (b)

| Wavelength ( $\text{cm}^{-1}$ ) | Functional Group                                                                                                                   |
|---------------------------------|------------------------------------------------------------------------------------------------------------------------------------|
| 2126                            | Carbodiimide group (N=C=N)                                                                                                         |
| 1647                            | Amide group peak I (C=O)                                                                                                           |
| 1558-1516                       | Amide group peak II N-H bending and C-H stretching at 1558 $\text{cm}^{-1}$ (shifted from 1516 $\text{cm}^{-1}$ in lysozyme alone) |
| 1406                            | O-H bending                                                                                                                        |
| 1258 - 1209                     | P=O of TPP in nanogels at 1258 $\text{cm}^{-1}$ (shifted from 1209 $\text{cm}^{-1}$ in TPP alone)                                  |
| 1136                            | O-P=O of TPP                                                                                                                       |

|             |                                                                                                                           |
|-------------|---------------------------------------------------------------------------------------------------------------------------|
| 1077 – 1008 | C-O stretching of the ether group in chitosan at $1077\text{cm}^{-1}$ (shifting to $1008\text{ cm}^{-1}$ in the nanogels) |
| 886         | Stretching vibrations of $\text{PO}_3$ in TPP                                                                             |
